# Supplementary material
Source: publisher figshare collection journal article supplement (https://acs.figshare.com/ndownloader/files/27905745)
Supplement: Supplementary file [file 27905745]

# Supporting Information: Laser-scribing optimization for sprayed SnO<sub>2</sub>-based perovskite solar modules on flexible plastic substrates

*Babak Taheri<sup>1</sup>, Francesca De Rossi<sup>1</sup>, Giulia Lucarelli<sup>1</sup>, Luigi Angelo Castriotta<sup>1</sup>, Aldo Di Carlo<sup>1,2,3</sup>, Thomas M. Brown<sup>1</sup>, Francesca Brunetti<sup>1\*</sup>*

<sup>1</sup> CHOSE, Department of Electronic Engineering, Università degli Studi di Roma Tor Vergata, Via del Politecnico 1, Rome, 00133, Italy

<sup>2</sup> LASE–Laboratory for Advanced Solar Energy, National University of Science and Technology MISiS, Moscow, Russia

<sup>3</sup> Institute for Structure of Matter, National Research Council (CNR-ISM), Rome, Italy

E-mail: francesca.brunetti@uniroma2.it

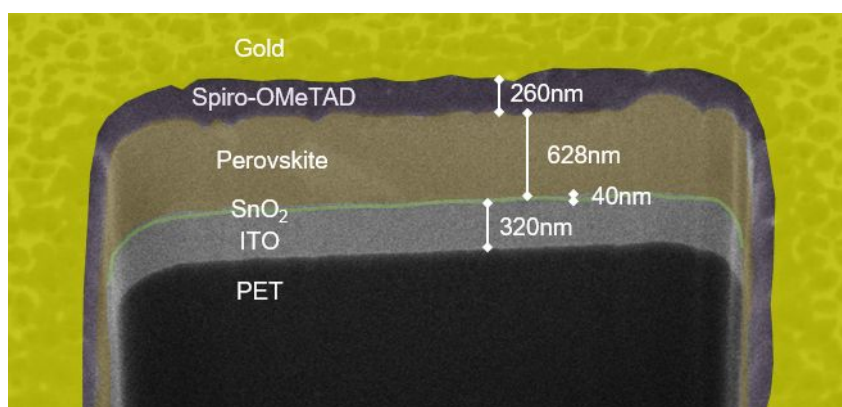

Figure S 1: FIB-cut cross-sectional SEM image of perovskite solar device.

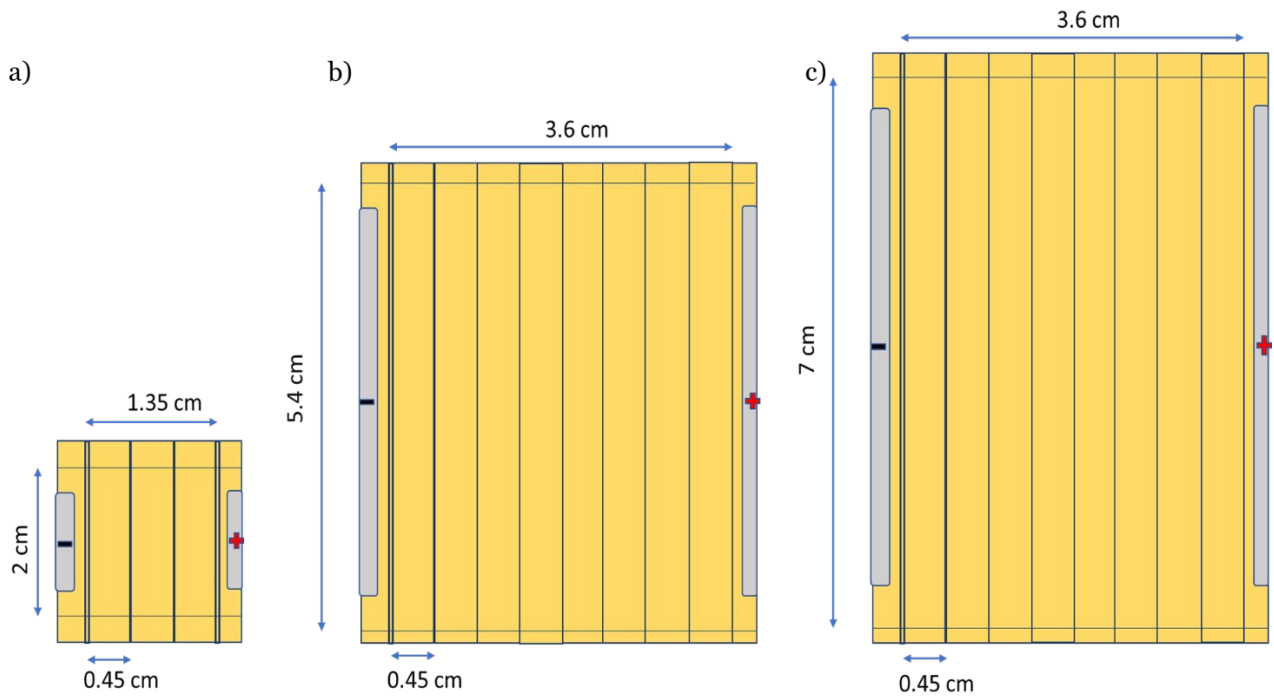

Figure S 2: Schematic representation of module layout a) mini modules with 2.34 cm<sup>2</sup> active area b) M1 modules with 16.84 cm<sup>2</sup> active area c) M2 modules with 21.84 cm<sup>2</sup> active area.

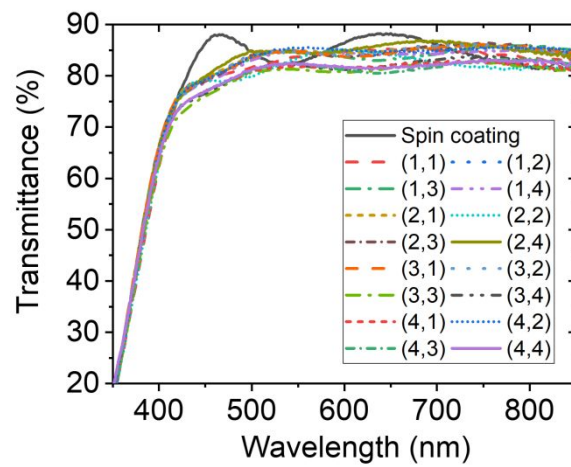

Figure S 3: Transmittance spectra of spray-coated SnO<sub>2</sub> samples from different portions of the 10×12.5 cm<sup>2</sup> flexible PET/ITO substrate used for the automatic spray coating process.

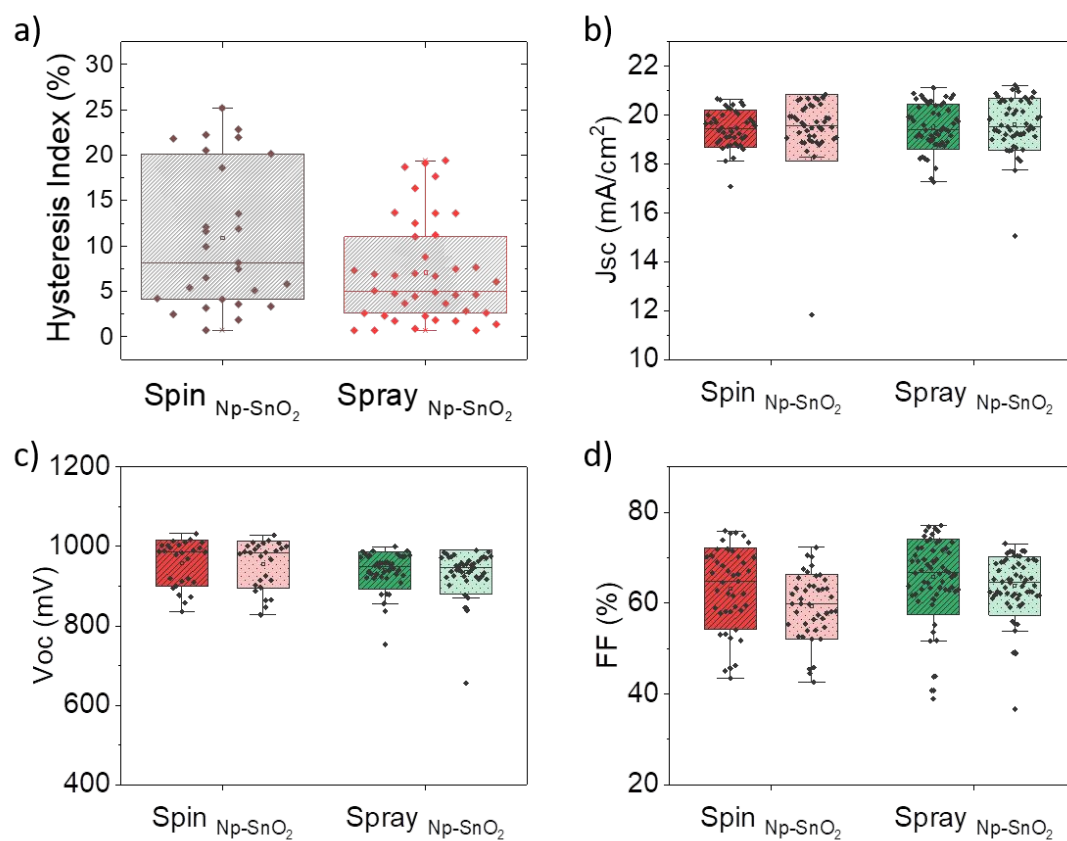

Figure S 4 : a) Hysteresis index calculated as follows:  $(PCE_{rev} - PCE_{for}) / PCE_{rev}$ ; b)  $J_{SC}$ , c)  $V_{OC}$  and d) FF obtained from the J-V curves of FPSCs endowed with spray and spin-coated SnO<sub>2</sub> layers.
